# Supplementary material for: Traumatic Stress, Chronic Ethanol Exposure, or the Combination, Alter Cannabinoid System Components in Reward and Limbic Regions of the Mouse Brain
Source: PubMed Central journal article supplement (PMC8038692; doi:10.3390/molecules26072086), 2021-04-06
Supplement: molecules-26-02086-s001.pdf [file molecules-26-02086-s001.pdf]

Supplementary Materials

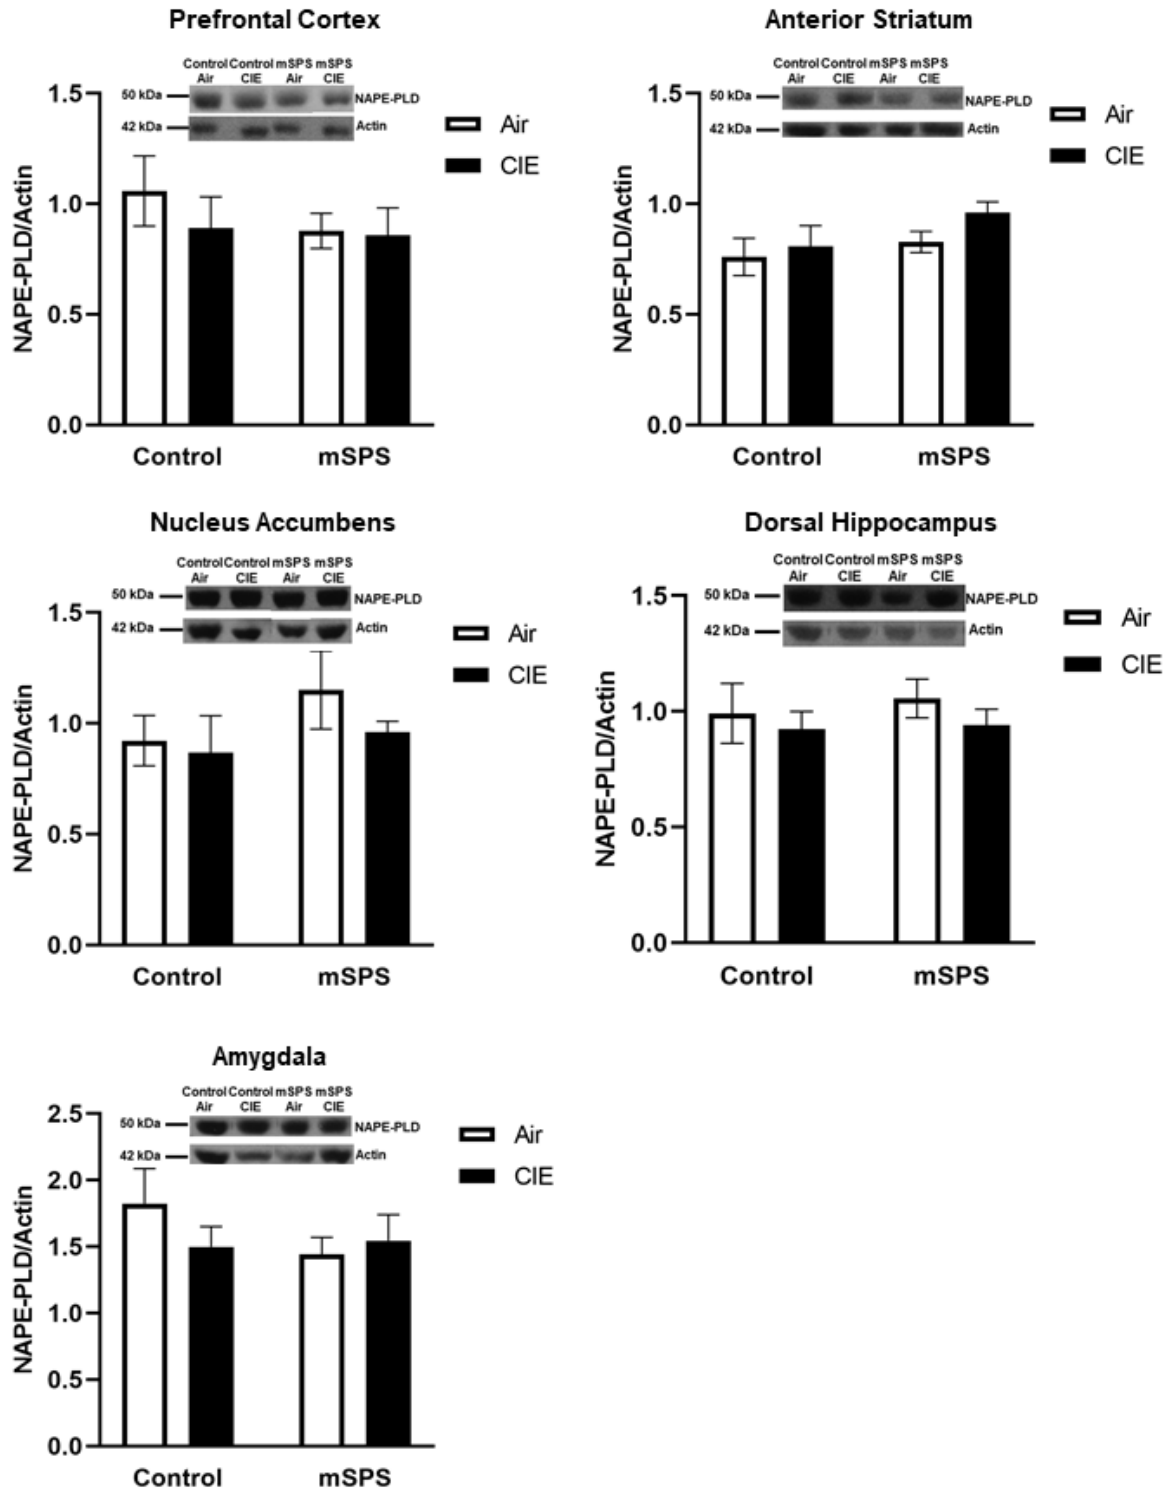

**Figure S1.** N-acyl phosphatidylethanolamine phospholipase (NAPE-PLD) levels in different brain regions of interest after mSPS/Control or Air/CIE exposures. Average NAPE-PLD levels in the A) prefrontal cortex (Control-Air: n = 7; Control CIE: n = 4; mSPS-Air: n = 5; mSPS-CIE: n = 8), B) anterior striatum (Control-Air:

n = 7; Control CIE: n = 4; mSPS-Air: n = 5; mSPS-CIE: n = 8), C) nucleus accumbens (Control-Air: n = 7; Control CIE: n = 4; mSPS-Air: n = 5; mSPS-CIE: n = 8), D) dorsal hippocampus (Control-Air: n = 7; Control CIE: n = 4; mSPS-Air: n = 5; mSPS-CIE: n = 8), and E) amygdala (one sample was excluded after outlier analysis; Control-Air: n = 7; Control CIE: n = 4; mSPS-Air: n = 5; mSPS-CIE: n = 7) (Inset: representative immunoblotting sample images) did not change among groups after mSPS/Control or Air/CIE exposures. Data are mean  $\pm$  SEM.

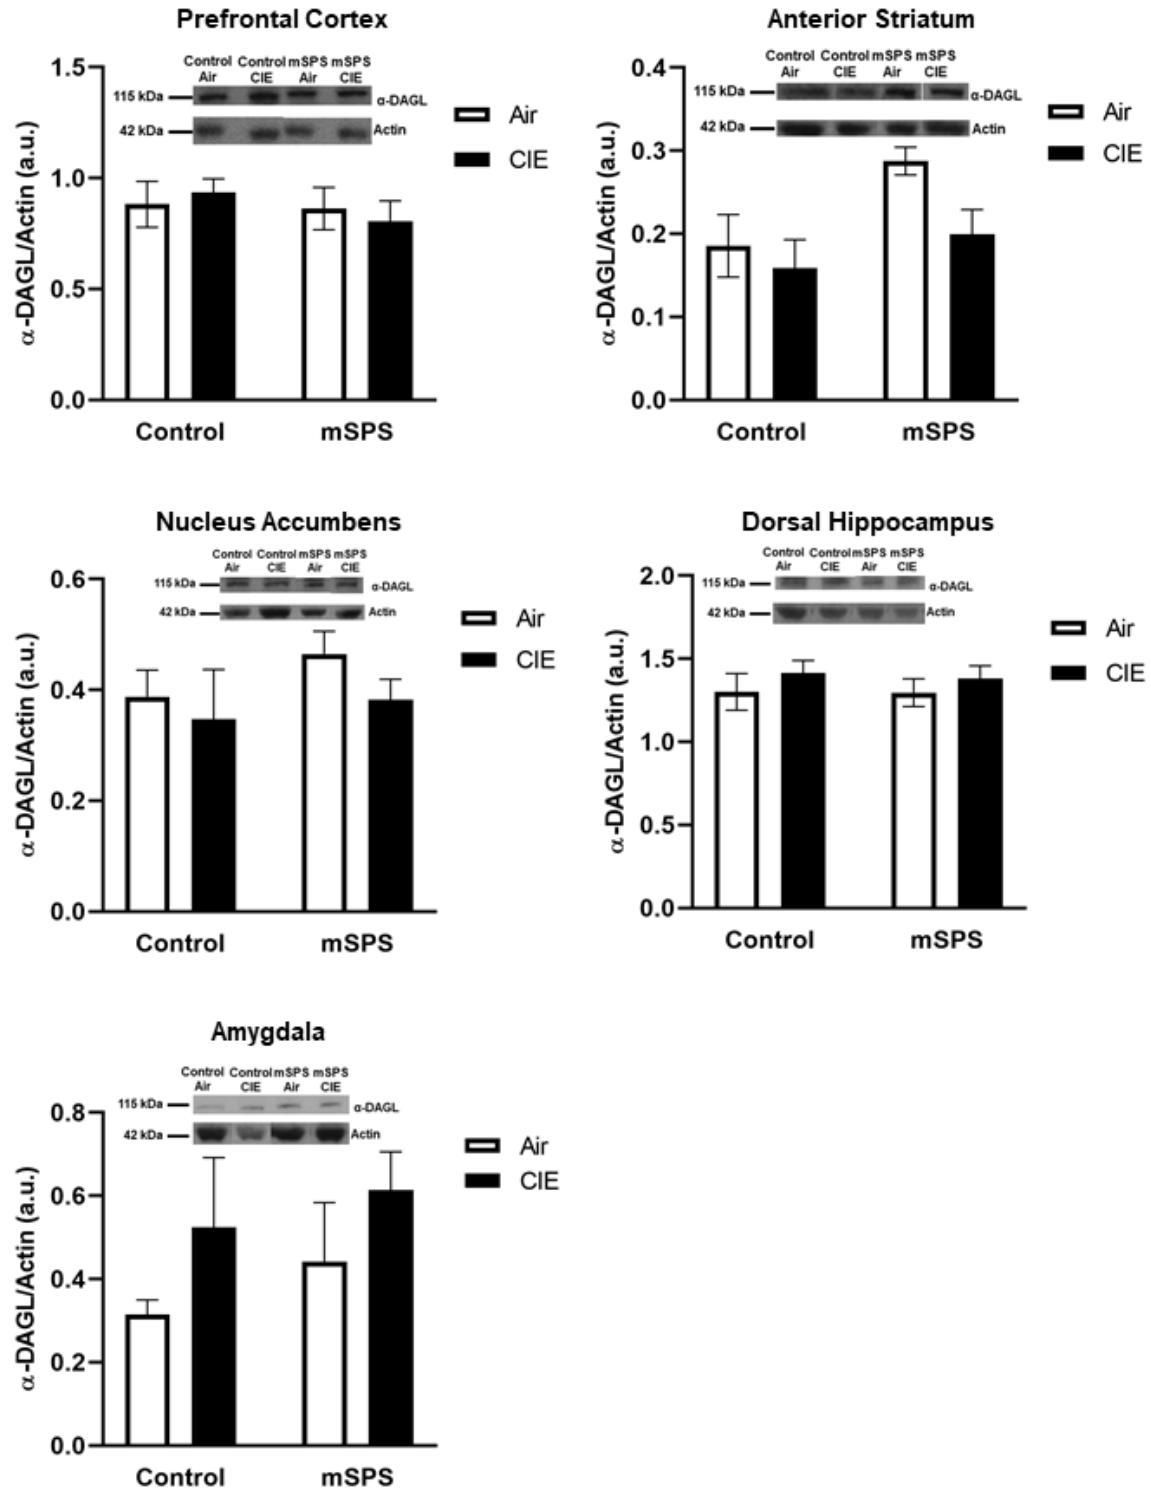

**Figure S2.**  $\alpha$ -Diacylglycerol lipase ( $\alpha$ -DAGL) levels in different brain regions of interest after mSPS/Control or Air/CIE exposures. Average  $\alpha$ -DAGL levels in the A) prefrontal cortex (Control-Air: n = 7; Control CIE: n = 4; mSPS-Air: n = 5; mSPS-CIE: n = 8), B) anterior striatum (Control-Air: n = 7; Control CIE: n = 4; mSPS-

Air: n = 5; mSPS-CIE: n = 8), C) nucleus accumbens (Control-Air: n = 7; Control CIE: n = 4; mSPS-Air: n = 5; mSPS-CIE: n = 8), D) dorsal hippocampus (one sample was excluded after outlier analysis; Control-Air: n = 7; Control CIE: n = 4; mSPS-Air: n = 5; mSPS-CIE: n = 7), and E) amygdala (one sample was excluded after outlier analysis; Control-Air: n = 6; Control CIE: n = 4; mSPS-Air: n = 5; mSPS-CIE: n = 8) (Inset: representative immunoblotting sample images) did not change among groups after mSPS/Control or Air/CIE exposures. Data are mean  $\pm$  SEM.

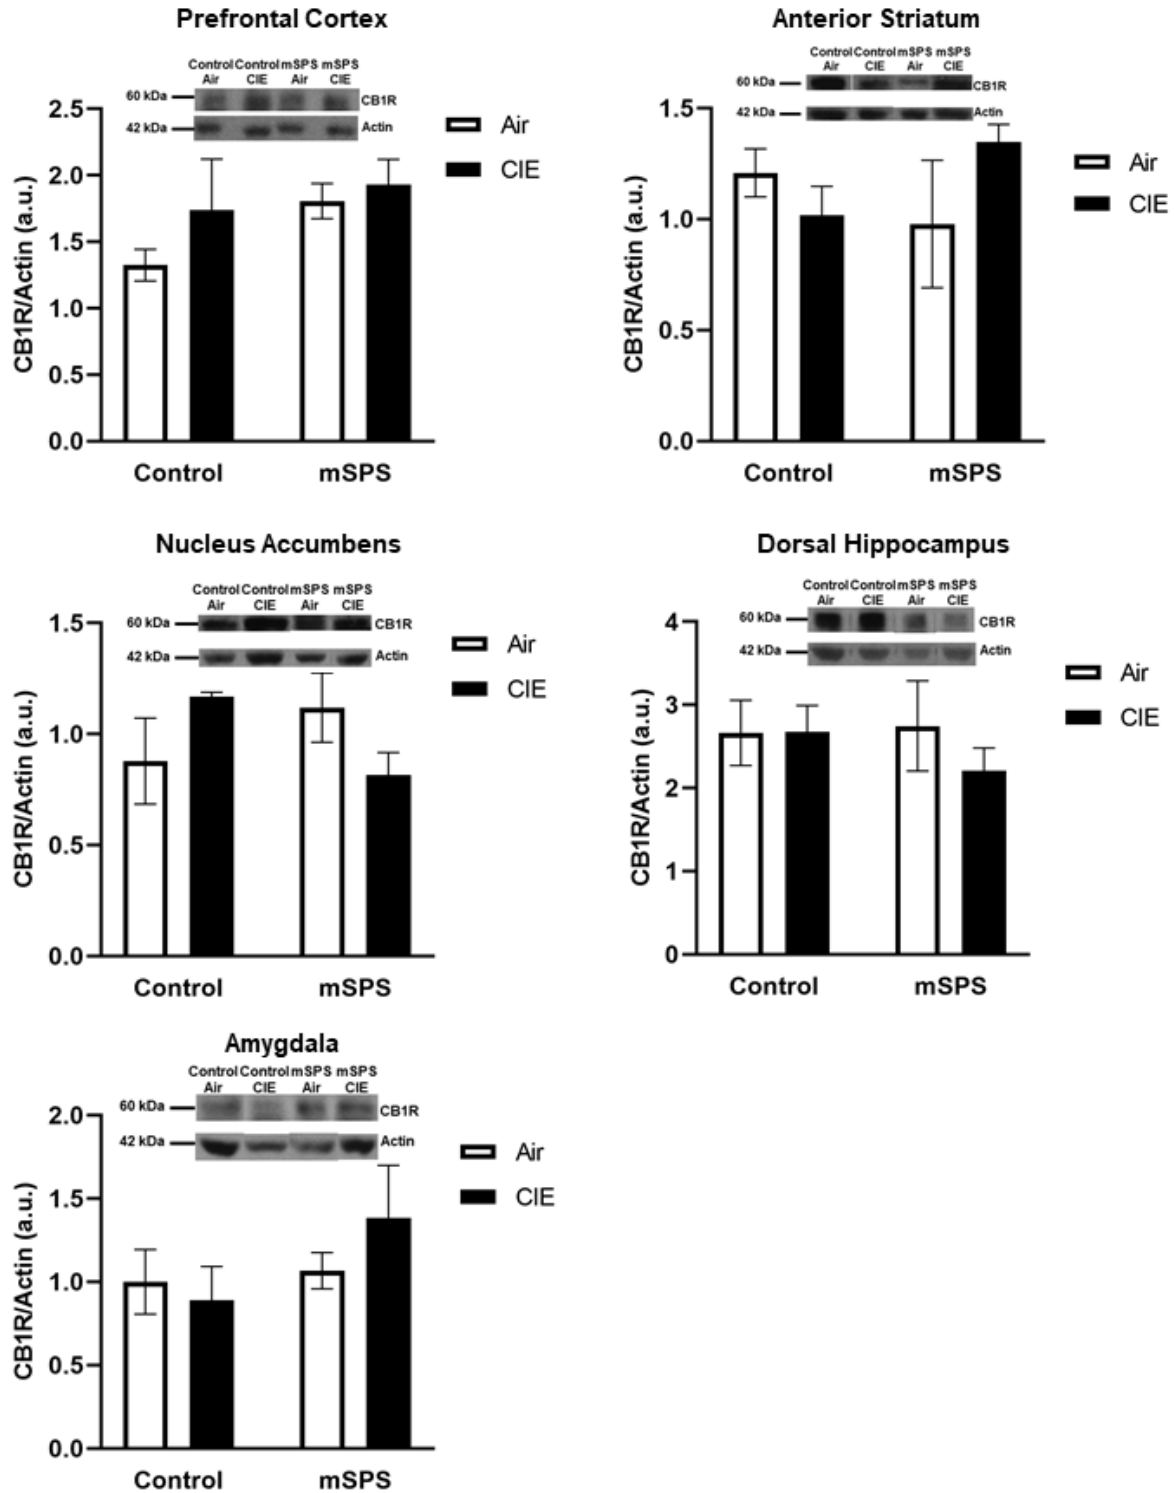

**Figure S3.** Cannabinoid 1 receptors (CB1R) levels in different brain regions of interest after mSPS/Control or Air/CIE exposures. Average CB1R levels in the A) prefrontal cortex (Control-Air: n = 7; Control CIE: n = 4; mSPS-Air: n = 5; mSPS-CIE: n = 8), B) anterior striatum (one sample was excluded after outlier analysis; Control-Air: n = 7; Control CIE: n = 4; mSPS-Air: n = 5; mSPS-CIE: n = 7), C) nucleus accumbens (one sample

was excluded after outlier analysis; Control-Air: n = 7; Control CIE: n = 3; mSPS-Air: n = 5; mSPS-CIE: n = 8), D) dorsal hippocampus (Control-Air: n = 7; Control CIE: n = 4; mSPS-Air: n = 5; mSPS-CIE: n = 8), and E) amygdala (Control-Air: n = 7; Control CIE: n = 4; mSPS-Air: n = 5; mSPS-CIE: n = 8) (Inset: representative immunoblotting sample images) did not change among groups after mSPS/Control or Air/CIE exposures. Data are mean  $\pm$  SEM.
